1 *Naegleria fowleri*: protein structures to facilitate drug discovery for the  
2 deadly, pathogenic free-living amoeba

3 Kayleigh Barrett<sup>1,8</sup>, Logan Tillery<sup>1,8</sup>, Jenna Goldstein<sup>†9</sup>, Jared W. Lassner<sup>†9</sup>, Bram Osterhout<sup>†9</sup>, Nathan L.  
4 Tran<sup>†9</sup>, Lily Xu<sup>†9</sup>, Ryan M. Young<sup>†9</sup>, Justin Craig<sup>1,8</sup>, Ian Chun<sup>1,8</sup>, David M. Dranow<sup>3,8</sup>, Jan Abendroth<sup>3,8</sup>,  
5 Silvia L. Delker<sup>3,8</sup>, Douglas R. Davies<sup>3,8</sup>, Stephen J. Mayclin<sup>3,8</sup>, Brandy Calhoun<sup>3,8</sup>, Madison J.  
6 Bolejack<sup>3,8</sup>, Bart Staker<sup>2,8</sup>, Sandhya Subramanian<sup>2,8</sup>, Isabelle Phan<sup>2,8</sup>, Donald D. Lorimer<sup>3,8</sup>, Peter J.  
7 Myler<sup>2,8,10,11,12</sup>, Thomas E. Edwards<sup>3,8</sup>, Dennis E. Kyle<sup>4</sup>, Christopher A. Rice<sup>4 Δ</sup>, James C. Morris<sup>5</sup>, James  
8 W. Leahy<sup>6</sup>, Roman Manetsch<sup>7</sup>, Lynn K. Barrett<sup>1,8</sup>, Craig L. Smith<sup>9</sup>, Wesley C. Van Voorhis<sup>1,8,12</sup>

9  
10 <sup>1</sup>Department of Medicine, Division Allergy and Infectious Disease, Center for Emerging and Re-  
11 emerging Infectious Disease (CERID) University of Washington, Seattle, WA, USA

12 <sup>2</sup>Seattle Children's Research Institute, Seattle, WA, USA

13 <sup>3</sup>UCB Pharma, Bainbridge Island, WA, USA

14 <sup>4</sup>Center for Tropical and Emerging Global Diseases, University of Georgia, Athens, GA, USA

15 <sup>5</sup>Eukaryotic Pathogens Innovation Center, Department of Genetics and Biochemistry, Clemson  
16 University, Clemson, SC, USA

17 <sup>6</sup>Department of Chemistry, University of South Florida, Tampa, FL, USA

18 <sup>7</sup>Department of Chemistry and Chemical Biology and Department of Pharmaceutical Sciences,  
19 Northeastern University, Boston, MA, USA

20 <sup>8</sup>Seattle Structural Genomics Center for Infectious Diseases, Seattle, WA, USA

21 <sup>9</sup>Department of Biology, Washington University, St. Louis, MO, USA

22 <sup>10</sup>Department of Pediatrics, University of Washington, Seattle, WA USA

23 <sup>11</sup>Department of Biomedical Informatics & Medical Education, University of Washington, Seattle, WA,  
24 USA

25 <sup>12</sup>Department of Global Health (Pathobiology), University of Washington, Seattle, WA, USA

26 \*Corresponding author

27 E-mail: [wesley@u.washington.edu](mailto:wesley@u.washington.edu)

28 † These authors contributed equally to this work

29 <sup>Δ</sup>Current address: Department of Pharmaceutical and Biomedical Sciences, College of  
30 Pharmacy, University of Georgia, Athens, Georgia, USA.

31 Short title; *Naegleria fowleri*: protein structures to facilitate drug discovery

32

33

34 **ABSTRACT:** *Naegleria fowleri* is a pathogenic, thermophilic, free-living amoeba which causes  
35 primary amebic meningoencephalitis (PAM). Penetrating the olfactory mucosa, the brain-eating  
36 amoeba travels along the olfactory nerves, burrowing through the cribriform plate to its  
37 destination: the brain's frontal lobes. The amoeba thrives in warm, freshwater environments,  
38 with peak infection rates in the summer months and has a mortality rate of approximately 97%.  
39 A major contributor to the pathogen's high mortality is the lack of sensitivity of *N. fowleri* to  
40 current drug therapies, even in the face of combination-drug therapy. To enable rational drug  
41 discovery and design efforts we have pursued protein production and crystallography-based  
42 structure determination efforts for likely drug targets from *N. fowleri*. *N. fowleri* genes were  
43 selected if they had homology to drug targets listed in Drug Bank or were nominated by primary  
44 investigators engaged in *N. fowleri* research. In 2017, 178 *N. fowleri* protein targets were queued  
45 to the Seattle Structural Genomics Center of Infectious Disease (SSGCID) pipeline, and to date  
46 89 soluble recombinant proteins and 19 unique target structures have been produced. Many of  
47 the new protein structures are potential drug targets and contain structural differences compared  
48 to their human homologs, which could allow for the development of pathogen-specific inhibitors.  
49 Five of the structures were analyzed in more detail, and four of five show promise that selective  
50 inhibitors of the active site could be found. The 19 solved crystal structures build a foundation  
51 for future work in combating this devastating disease by encouraging further investigation to  
52 stimulate drug discovery for this neglected pathogen.

## 53 1. INTRODUCTION

54 In Australia in 1965, Fowler and Carter reported the first case of *Naegleria fowleri* infection,  
55 commonly referred to as the “brain-eating amoeba”, which is the only known species of the  
56 *Naegleria* genus associated with human disease (1). The free-living amoeba is found in soil and  
57 freshwater on all seven continents, but is mainly found in warmer regions flourishing in  
58 freshwater and soils with higher temperatures up to 115°F (46°C) (2).

59  
60 Infection rates of the amoeba increase during summer months causing the disease, primary  
61 amebic meningoencephalitis (PAM) (2,3). PAM is a fatal CNS disease that displays severe  
62 meningitis and cranial pressure caused by inflammation of the brain (3,4). The National Institute  
63 of Allergy and Infectious Diseases (NIAID) has classified *N. fowleri* as a category B priority  
64 pathogen, the second highest class of priority organisms/biological agents. Category B pathogens  
65 typically have high mortality rates, are easily disseminated, may cause public panic and social  
66 disruption, and require special action for public health preparedness (2,5).

67  
68 Between the years 1962 and 2016, 145 cases were reported by the CDC within the USA, and  
69 only 4 patients (3%) survived *N. fowleri* infection and subsequent PAM (6). This 54-year  
70 reporting tally might suggest only several PAM cases occur in the USA a year. However, a  
71 recent review found that hundreds of undiagnosed cases of fatal “meningitis and encephalitis”  
72 were reported in the summers between the years 1999 and 2010 in persons aged 2-22 years in the  
73 Southeast USA (7). Cases lacking diagnostic brain biopsy or spinal fluid analysis of PAM may  
74 account for a portion of the undiagnosed, inconclusive cases (7). Thus, the incidence of *N.*  
75 *fowleri* infections in the USA is probably much higher than several a year arguing, that *N.*

76 *fowleri* poses a much higher public health threat than the documented cases would suggest (7).  
77 Rising global temperatures has also led to claims of increased risk of infections due to spread of  
78 suitable water conditions for *N. fowleri* (3,8).

79  
80 The global burden of *N. fowleri* PAM cases is likely greater than anticipated, yet undefined.  
81 Aga Khan University in Karachi, Pakistan has reported a rise in the number of PAM cases. Aga  
82 Khan Hospital serves only a small fraction of the Karachi population (~23 million total) and  
83 reports around 20 cases/year of PAM. Other hospitals in Karachi did not report a single case  
84 during the same time, likely due to the lack of awareness, autopsies, and microscopy (9). Only  
85 about 10 cases of *N. fowleri* PAM have been reported in Africa, though the numbers are likely  
86 impacted by a reporting bias, as the resources for diagnostic brain biopsy are rarely present, and  
87 autopsies are almost never performed (10).

88  
89 The combination of a devastating mortality rate, a warming climate, and a rapid-onset  
90 infection emphasize why *N. fowleri* should not stay a neglected organism. Treatment is  
91 extremely limited and not well defined, using a combination of known antifungals, antibiotics  
92 and microbicides (11). Amphotericin B is the current drug of choice, in high dosages, in  
93 combination with other repurposed drugs such as rifampin, miltefosine, and fluconazole (9,12).  
94 Recent studies suggest that posaconazole is more efficacious than fluconazole in vitro and in  
95 animal models of PAM (12). Miltefosine was used in combination to successfully treat two  
96 patients, one reported and one unreported in the literature. Miltefosine in combination is not  
97 always helpful, in that a patient was treated with miltefosine and suffered permanent brain  
98 damage and another had a fatal outcome (11,13). The multi-drug therapy is associated with

99 severe adverse effects and requires higher than normal dosages to penetrate the blood-brain  
100 barrier and to reach the CNS (11,14). New development of rapid-onset, brain permeable,  
101 efficient, and safe drugs is urgently needed.

102  
103 Given the lack of understanding about causes of drug resistance of *N. fowleri* and the urgent  
104 need for new drugs, we investigated the proteome of *N. fowleri* for likely drug targets attempting  
105 to enable further drug discovery efforts by producing material for characterization of the  
106 proteins. This work is a first step towards the discovery of drugs specifically designed against *N.*  
107 *fowleri*.

108

## 109 **2. RESULTS**

### 110 **2.1 The *N. fowleri* proteome contains hundreds of potential drug targets.**

111 Potential drug targets were selected by sequence homology to DrugBank protein targets  
112 (15). Additional targets were requested by the amoeba research community, leading to a total of  
113 178 *N. fowleri* targets entering the Seattle Structural Genomics for Infectious Disease (SSGCID)  
114 structure determination pipeline. The SSGCID is a National Institutes for Allergy and Infectious  
115 Disease (NIAID) supported preclinical service for external investigators ([www.SSGCID.org](http://www.SSGCID.org))  
116 (16). All targets were filtered according to the standard SSGCID target selection protocol and  
117 criteria (13): eliminating proteins with over 750 amino acids, 10 or more cysteines, or 95%  
118 sequence identity with 70% coverage to proteins already in the PDB, targets claimed or worked  
119 on by other scientific groups, and targets with transmembrane domains (except where a soluble  
120 domain could be expressed separately) (18). Target criteria resulted in selection of 178 proteins  
121 which entered the SSGCID production pipeline. These proteins, homologous to other known

122 drug targets, consisted of metabolic enzymes, protein synthetases, kinases, and others. Real-time  
 123 updates to target status progress can be viewed at the SSGCID website. **Figure 1** shows a view  
 124 of current status. Additionally, a detailed table of the *Naegleria* protein crystallography statistics  
 125 is available in Supplemental Information.  
 126

| SSGCID ID<br>[Center ID] | Family<br>ID | Annotation                                                                           | Target<br>Approved | Selected | Cloned | Expressed | Soluble | Purified | Crystal-<br>lized | Diff-<br>raction<br>Data | HSQC | NMR<br>Assigned | In<br>PDB | Work<br>Stopped | Expression<br>Clones*<br>Available | Protein<br>Available | Most<br>Recent<br>Activity |
|--------------------------|--------------|--------------------------------------------------------------------------------------|--------------------|----------|--------|-----------|---------|----------|-------------------|--------------------------|------|-----------------|-----------|-----------------|------------------------------------|----------------------|----------------------------|
| NafoA.20238.a            | 20238        | deoxyhypusine hydroxylase                                                            |                    |          |        |           |         |          |                   |                          |      |                 |           |                 | 0                                  | 0                    | 9/24/2020                  |
| NafoA.18219.a            | 18219        | transcript1: glycolipide n-tetradecanoyltransferase 1; n-myristoyltransferase (nmt1) |                    |          |        |           |         |          |                   |                          |      |                 |           |                 | 0                                  | 0                    | 8/27/2020                  |
| NafoA.20414.a            | 20414        | phosphatidylinositol 3-kinase 2, mRNA1 (PI3K)                                        |                    |          |        |           |         |          |                   |                          |      |                 |           |                 | 0                                  | 0                    | 7/10/2020                  |
| NafoA.20399.a            | 20399        | Phosphatidylinositol 3-kinase 2 (PI3K)                                               |                    |          |        |           |         |          |                   |                          |      |                 |           |                 | 0                                  | 0                    | 7/10/2020                  |
| NafoA.18272.b            | 18272        | peptidyl-prolyl cis-trans isomerase fxbp1a                                           |                    |          |        |           |         |          |                   |                          |      |                 |           |                 | 0                                  | 0                    | 7/10/2020                  |
| NafoA.01088.a            | 01088        | heterotrimeric G-protein alpha subunit                                               |                    |          |        |           |         |          |                   |                          |      |                 |           |                 | 0                                  | 0                    | 6/4/2020                   |
| NafoA.01541.a            | 01541        | deoxyhypusine synthase                                                               |                    |          |        |           |         |          |                   |                          |      |                 |           |                 | 1                                  | 0                    | 5/25/2020                  |
| NafoA.01340.a            | 01340        | dihydrolipoyl dehydrogenase                                                          |                    |          |        |           |         |          |                   |                          |      |                 |           |                 | 1                                  | 0                    | 5/25/2020                  |
| NafoA.19531.a            | 19531        | regulator of heterotrimeric G proteins RGS4                                          |                    |          |        |           |         |          |                   |                          |      |                 |           |                 | 1                                  | 0                    | 5/4/2020                   |
| NafoA.01011.a            | 01011        | calcium calmodulin-dependent protein phosphatase                                     |                    |          |        |           |         |          |                   |                          |      |                 |           |                 | 2                                  | 1                    | 4/1/2020                   |
| NafoA.19390.a            | 19390        | phosphatidylinositol 3-kinase 2, mRNA2 (PI3K)                                        |                    |          |        |           |         |          |                   |                          |      |                 |           |                 | 0                                  | 0                    | 2/28/2020                  |
| NafoA.01391.a            | 01391        | casein kinase                                                                        |                    |          |        |           |         |          |                   |                          |      |                 |           |                 | 1                                  | 0                    | 2/24/2020                  |
| NafoA.20395.a            | 20395        | hsp90 co-chaperone                                                                   |                    |          |        |           |         |          |                   |                          |      |                 |           |                 | 0                                  | 0                    | 2/13/2020                  |
| NafoA.18664.a            | 18664        | calcium calmodulin-dependent protein kinase c                                        |                    |          |        |           |         |          |                   |                          |      |                 |           |                 | 0                                  | 0                    | 2/13/2020                  |
| NafoA.01515.a            | 01515        | cyclin-dependent kinase 1-like, cell division control protein 2                      |                    |          |        |           |         |          |                   |                          |      |                 |           |                 | 2                                  | 1                    | 2/2/2020                   |
| NafoA.20237.a            | 20237        | translation initiation factor eif-5a family protein                                  |                    |          |        |           |         |          |                   |                          |      |                 |           |                 | 0                                  | 0                    | 1/2/2020                   |
| NafoA.19531.b            | 19531        | regulator of heterotrimeric G proteins RGS2                                          |                    |          |        |           |         |          |                   |                          |      |                 |           |                 | 1                                  | 1                    | 12/28/2019                 |
| NafoA.01088.d            | 01088        | heterotrimeric G-protein alpha subunit Galpha2                                       |                    |          |        |           |         |          |                   |                          |      |                 |           |                 | 2                                  | 1                    | 12/28/2019                 |
| NafoA.01088.e            | 01088        | heterotrimeric G-protein alpha subunit Galpha7                                       |                    |          |        |           |         |          |                   |                          |      |                 |           |                 | 1                                  | 0                    | 12/28/2019                 |
| NafoA.00032.a            | 00032        | s-adenosyl-L-homocysteine hydrolase                                                  |                    |          |        |           |         |          |                   |                          |      |                 |           |                 | 1                                  | 2                    | 12/28/2019                 |

127 **Figure 1. Status of *Naegleria* targets in the SSGCID pipeline as of 10/1/2020.** This view is publicly  
 128 available at [www.ssgcid.org](http://www.ssgcid.org) through the Targets tab, sorting by genus. Targets are displayed by SSGCID identifier  
 129 and annotation with current status shown by green bars, sorted here by most recent activity reported to the database.  
 130 The number of expression clones is shown and indicates different forms of the target that are available to external  
 131 users and can be ordered. Protein availability also indicates samples of protein available to the external community  
 132 and represents at least one vial of concentrated protein of approximately 100 microliters ranging from 10-50 mg/mL  
 133 of >95% purity material.

134

## 135 2.2 One third of targets attempted produced soluble protein.

136 The open reading frames of each target were obtained from AmoebaDB.org. Progression of  
 137 the targets through the SSGCID protein production pipeline is shown in **Table 1**. Of the 178  
 138 NIAID approved targets, 177 were selected for cloning. One protein target was eliminated due to  
 139 redundancy given its 100% identity match and 84% coverage to another protein target already in  
 140 the SSGCID pipeline. Of the 177 targets attempted in PCR amplification using *N. fowleri* cDNA,

141 133 were successfully amplified and cloned into SSGCID expression vectors (75%) (17). In  
142 small-scale expression screening, 82 of the 133 successfully cloned targets (61.6%)  
143 demonstrated soluble expression with a N-terminal His6-tag vector (17). Of these 82 soluble  
144 proteins, 64 proteins were purified to >95% purity with yields ranging from 1.1 mg to 348 mg.  
145 These proteins are available, under request, at SSGCID.org.

146

147 **Table 1. Target status of *N. fowleri* proteins within SSGCID pipeline.**

|                         |     |
|-------------------------|-----|
| Target approved         | 178 |
| Selected                | 177 |
| Cloned                  | 133 |
| Expressed               | 98  |
| Soluble                 | 82  |
| Purified                | 64  |
| Crystallized            | 29  |
| Diffraction             | 27  |
| Native diffraction data | 19  |
| <b>In PDB (apo)</b>     | 19  |

148

149 **2.3 *N. fowleri* proteins resulted in a 11% structure determination success rate.**

150 Following purification of high-purity preparations of protein, the targets were submitted for  
151 structure determination by X-ray crystallography. Of the 64 proteins produced, 26 crystallized  
152 (29%), and 20 diffracted, 19 of which met the SSGCID resolution quality criteria and were  
153 submitted to the Protein Data Bank (PDB). **Table 2** lists the 19 targets deposited in PDB that will  
154 be reported in this paper, including five structures with a unique ligand bound, for a total of 23  
155 PDB deposits. Overall, this resulted in a structure determination success rate of 11%, which is  
156 comparatively higher than usual structural genomic pipeline rates reported by us or other  
157 structural genomic groups (19).



158

159 **Table 2. Listing of *Naegleria fowleri* structures deposited by SSGCID in the PDB.**

| SSGCID ID            | Annotation                                            | AmoebaDB    | PDB ID     | Metabolic pathway                       |
|----------------------|-------------------------------------------------------|-------------|------------|-----------------------------------------|
| <b>NafoA.00005.a</b> | Malate dehydrogenase 2 (mitochondrial)                | BF0021050   | 6UM4       | TCA cycle                               |
| <b>NafoA.01242.a</b> | dUTP pyrophosphatase                                  | NF0068730   | 5VJY, 6MJK | DNA replication                         |
| <b>NafoA.00085.a</b> | GDP-L-fucose synthetase                               | NF0109030   | 6AQY, 6AQZ | Glycolysis                              |
| <b>NafoA.00085.b</b> | GDP-mannose dehydratase                               | NF0016040   | 5UZH       | Glycolysis                              |
| <b>NafoA.00855.a</b> | Glyceraldehyde-3-phosphate dehydrogenase              | NF0055660   | 6NLX       | Glycolysis                              |
| <b>NafoA.19900.a</b> | Glucokinase                                           | NF0035880   | 6DA0       | Glycolysis                              |
| <b>NafoA.01088.e</b> | Heterotrimeric G-protein alpha subunit Galpha7        | NF0037180   | 6NE6       | GPCR signaling                          |
| <b>NafoA.00438.a</b> | Nucleoside diphosphate kinase                         | NF0036070   | 5U2I       | Purine metabolism                       |
| <b>NafoA.18272.a</b> | Peptidylprolyl isomerase                              | NF0084240_2 | 6B4P, 6MKE | Post-translational protein modification |
| <b>NafoA.01013.a</b> | Phosphoglycerate mutase                               | NF0048460   | 5VVE       | Glycolysis                              |
| <b>NafoA.18681.a</b> | Prolyl-tRNA synthetase                                | NF0061610   | 6NAB, 6UYH | Amino acid response                     |
| <b>NafoA.01523.a</b> | Protein arginine n-methyltransferase                  | NF0022020   | 6CU3, 6CU5 | Post-translational protein modification |
| <b>NafoA.19251.a</b> | Polyubiquitin with 3 ub domains                       | NF0029300_2 | 5VIX       | Ubiquitination                          |
| <b>NafoA.01385.a</b> | Rab GDP dissociation inhibitor alpha                  | NF0049320   | 6C87       | Signaling pathways                      |
| <b>NafoA.00927.a</b> | Ras-related c3 botulinum toxin substrate 1 isoform x2 | NF0029600_1 | 5VCU       | Signaling pathways                      |
| <b>NafoA.00032.a</b> | S-adenosyl-L-homocysteine hydrolase                   | NF0035640   | 5V96       | Methylation metabolism                  |
| <b>NafoA.01238.a</b> | Serine-tRNA synthetase                                | NF0119870   | 6BLJ       | Protein synthesis                       |
| <b>NafoA.00964.a</b> | Trafficking protein particle complex subunit 3        | NF0066220   | 6AQ3       | Protein trafficking                     |
| <b>NafoA.00601.c</b> | Ubiquitin-conjugating enzyme e2                       | NF0031160_1 | 5V0R, 6MJ9 | Ubiquitination                          |

160

161 **2.4 Comparative analysis of *N. fowleri* and *Homo sapiens* enzyme active sites suggest**

162 **some targets have promise for selective inhibition.**

163 We have already published that glucokinase inhibitors can be obtained that are selective for

164 *N. fowleri* vs. the human homolog, supporting glucokinase as a target for *N. fowleri* therapeutics

165 (20). We analyzed the other structures determined, comparing the *N. fowleri* structure to human

166 homolog structures, in order to determine opportunities for selective design of chemical

167 inhibitors. Comparison of the *N. fowleri* determined structure to human structures available in

168 the PDB was done by superimposition of the coordinate files (**Table 3**). With the exception of a

169 pair of 96% identical *N. fowleri* and human ubiquitin-conjugating enzymes e2, all of the *N.*

170 *fowleri* enzymes differed from human homologs by more than 38% (**Table 3**). We wanted to

171 focus on the known ligand binding sites, to search for potential differences for inhibitors. A

172 PDB search revealed that five of the 19 *N. fowleri* structures determined also had human

173 homolog structures determined which contained a known inhibitor of the human protein (**Table**  
 174 **3**). We then manually inspected and compared the binding sites of these five proteins, described  
 175 below for each protein. Despite sequence similarities of the active sites, there were four cases  
 176 where a case for active site specificity could be made, supporting these proteins as targets for  
 177 therapeutics for *N. fowleri*.

178

179 **Table 3. Comparative analysis of *N. fowleri* and human structures deposited the PDB.**

| Annotation                                            | PDB ID     | # Amino acids | Human PDB ID | Coverage (#aa) | % Coverage | % Identity of coverage | Inhibitor or ligand in human structure |
|-------------------------------------------------------|------------|---------------|--------------|----------------|------------|------------------------|----------------------------------------|
| malate dehydrogenase (mitochondrial) (MDH2)           | 6UM4       | 436           | 4WLF         | 221            | 51%        | 26%                    | -                                      |
| dUTP pyrophosphatase                                  | 6MJK, 5VJY | 147           | 2HQU_A       | 136            | 93%        | 63%                    | -                                      |
| GDP-L-fucose synthetase                               | 6AQY, 6AQZ | 333           | 4E5Y_A       | 311            | 93%        | 52%                    | -                                      |
| GDP-mannose-dehydratase                               | 5UZH       | 380           | 6GPJ_A       | 343            | 90%        | 68%                    | -                                      |
| glyceraldehyde-3-phosphate dehydrogenase              | 6NLX       | 333           | 6YNF_A       | 324            | 97%        | 65%                    | -                                      |
| heterotrimeric G-protein alpha subunit Galpha7        | 6NE6       | 321           | 6K41_A       | 312            | 97%        | 41%                    | -                                      |
| nucleoside diphosphate kinase                         | 5U2I       | 151           | 1JXV_A       | 151            | 100%       | 63%                    | -                                      |
| peptidylprolyl isomerase                              | 6MKE, 6B4P | 119           | 4DRO_A       | 113            | 95%        | 53%                    | FK506-AN                               |
| phosphoglycerate mutase                               | 5VVE       | 250           | 5Y65_C       | 250            | 100%       | 61%                    | KH2                                    |
| prolyl-tRNA synthetase                                | 6NAB, 6UYH | 535           | 5VAD_A       | 526            | 98%        | 54%                    | 91Y                                    |
| protein arginine n-methyltransferase                  | 6CU3, 6CU5 | 328           | 6NT2_A       | 310            | 95%        | 53%                    | GSK3368715                             |
| polyubiquitin with 3 ub domains                       | 5VIX       | 230           | 5H07_A       | 227            | 99%        | 96%                    | -                                      |
| rab GDP dissociation inhibitor alpha                  | 6C87       | 444           | n/a          |                |            |                        | -                                      |
| ras-related c3 botulinum toxin substrate 1 isoform x2 | 5VCU       | 200           | 1I4D_D       | 191            | 96%        | 55%                    | -                                      |
| S-adenosyl-L-homocysteine hydrolase                   | 5V96       | 472           | 1LI4_A       | 427            | 90%        | 57%                    | Neplanocin                             |
| Serine-tRNA ligase                                    | 6BLJ       | 477           | 4L87_A       | 458            | 96%        | 52%                    | -                                      |
| trafficking protein particle complex subunit 3        | 6AQ3       | 187           | 2CFH_A       | 176            | 94%        | 47%                    | -                                      |
| ubiquitin-conjugating enzyme e2                       | 6MJ9, 5V0R | 161           | 4ONM_A       | 126            | 78%        | 48%                    | -                                      |

180

181 *N. fowleri* S-adenosyl-L-homocysteine hydrolase (*NfSAHH*) catalyzes the breakdown of

182 S-adenosyl-homocysteine (SAH) into adenosine and homocysteine. SAH is a byproduct of S-

183 adenosyl-L-methionine as a methyltransferase; the transfer of a methyl group to its respective  
184 cellular substrates such as DNA or rRNA, produces SAH (21). SAH hydrolases play a central  
185 role in methylation reactions required for growth and gene regulation, and inhibitors of SAH  
186 hydrolase are expected to be antimicrobial drugs, especially for eukaryotic parasites (21).  
187 Ribavirin is structurally similar to adenosine and has been proved to produce a time-dependent  
188 inactivation of human (*Hs*) SAHH and *Trypanosoma cruzi* (*Tc*) SAHH (22).

189  
190 The *Nf*SAHH asymmetric unit contains a homo-tetramer (**Figure 2**). Although each chain  
191 contains an active site, structural analysis indicates that two chains must be present for the  
192 hydrolysis reaction to occur successfully. Each chain consists of three domains: a substrate-  
193 binding, a cofactor-binding, and a C-terminus domain (23). When substrates are not bound, the  
194 substrate-binding domain is located on the exterior, far from the meeting point of all four  
195 subunits of the asymmetric unit (24). The C-terminus domain is involved in both cofactor  
196 binding and protein oligomerization (23). In addition to the three main constituents, the structure  
197 contains two hinge regions that connect the substrate-binding and cofactor-binding domains.  
198 When substrates bind, the hinge region changes conformation, closing the cleft between the  
199 substrate-binding domain and the cofactor-binding domain of the respective chain (24). In the  
200 structure of *Nf*SAHH, all subunits exhibit a closed conformation.

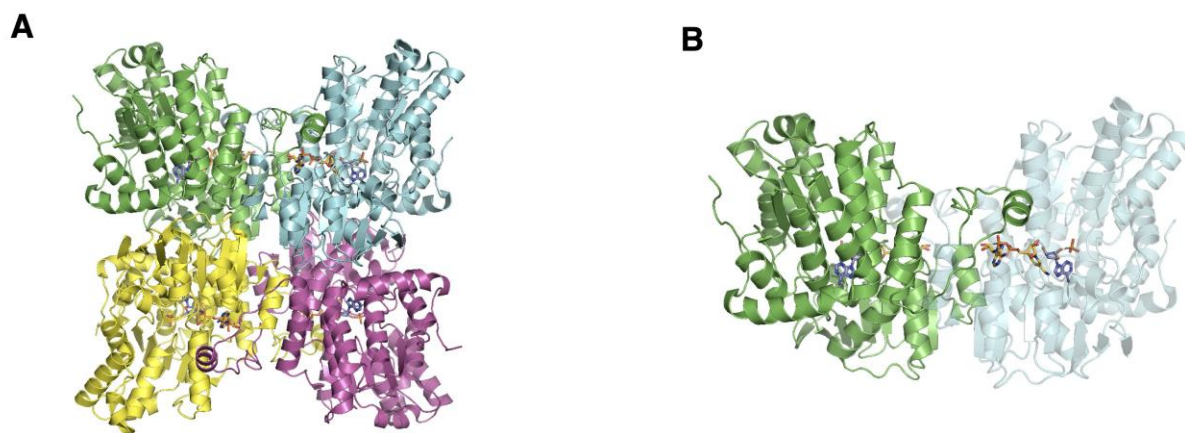

201

202 **Figure 2. Crystal structure of *NfSAHH* (PDB: 5V96) solved at a 2 Å resolution. (A)** The asymmetric unit  
203 of SAHH. Individual polypeptide chains are colored green (chain A), pink (chain B), yellow (chain C), and cyan  
204 (chain D). **(B)** The biological unit is a homotetramer with a 2-fold axis of symmetry. Each of the four chains has its  
205 own active site containing one NAD<sup>+</sup> molecule (yellow), one adenosine molecule (purple), and a phosphate  
206 (orange).

207

208 SAHH is one of the most highly conserved proteins among species, with many of the same  
209 amino acids binding the same substrates across homologs. *NfSAHH* is 62% identical to the  
210 human homolog. In the NAD binding region, conserved Lys and Tyr bind via hydrogen bonds to  
211 oxygens of NAD in both *NfSAHH* and *HsSAHH* (24) (**Figure 3**). Residues involved with  
212 binding adenosine (ADO) are also highly conserved, with Gly341-His342-Phe333 being  
213 completely conserved (24). To regulate the entrance of substrates into/out of the active site, there  
214 is a highly conserved His-Phe sequence within the cofactor-binding domain. This works as a  
215 molecular gate that, when the protein is in open conformation, allows access to the substrate-  
216 pocket (23).

217

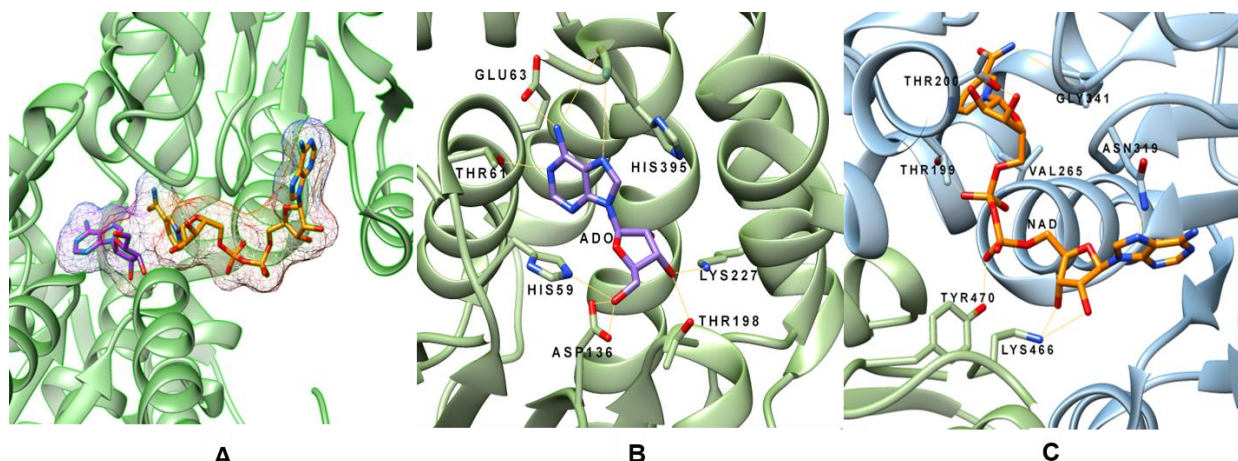

218 **Figure 3. Overview of *NfSAHH* active site binding.** (A) Nicotinamide adenine dinucleotide (NAD/orange  
219 sticks) and adenosine (ADO/purple sticks) both fit well within the structure of SAHH. (B) Hydrogen-bond network  
220 denoted by yellow dashed lines around ADO involving chain A. (C) Hydrogen-bond network involving NAD with  
221 chain A (blue) and chain B (green).

222

223 A search of the PDB for *HsSAHH* structures found multiple inhibitor bound human  
224 structures including 1LI4 (neplanocin) and 5W49 (oxadiazole compound). A comparison of the  
225 *NfSAHH* structure to the neplanocin bound human structure revealed a highly conserved  
226 conformation of the protein. In the neplanocin bound structure, the two domains of the monomer  
227 are similar to the *NfSAHH* structure. However, in the oxadiazole bound structure, two domains  
228 of the monomer are in a more open conformation, where the C-terminal and N-terminal domains  
229 have opened up relative to each other in a hinge-opening motion. The oxadiazole compound  
230 stretches across the interface and is surrounded by 11 residues within 4 Å. Of the 11 residues  
231 coordinating the inhibitor oxadiazole compound of the 5W49 structure, 10 are identical between  
232 the *Naegleria* and human SAHH. Only one change of M351T relative to the human enzyme is  
233 present, suggesting a highly conserved inhibitor binding site.

234

235 The crystal structure of *Nf*SAHH (**Figure 4**) contains the adenosine substrate and NAD  
236 cofactors bound to the active site to guide structure-activity relationships that could help to  
237 optimize adenosine analog compounds. The sequence differences that line the access channel at  
238 the dimer interface allow a rational approach to selectively inhibit the otherwise highly  
239 conserved active site (25). Amoeba SAHs have an additional helix insertion that in *Nf*SAHH  
240 forms a hydrophobic groove accessible from the adenosine binding site (**Figure 4 B, C**).  
241 Specificity could be achieved by designing compounds that simultaneously target this  
242 hydrophobic pocket and the active site (**Figure 4**). Thus, we feel a reasonable case can be made  
243 that structural differences, close to the active site, would allow development of specific  
244 *Ng*SAHH inhibitors supporting development of a therapeutic.  
245

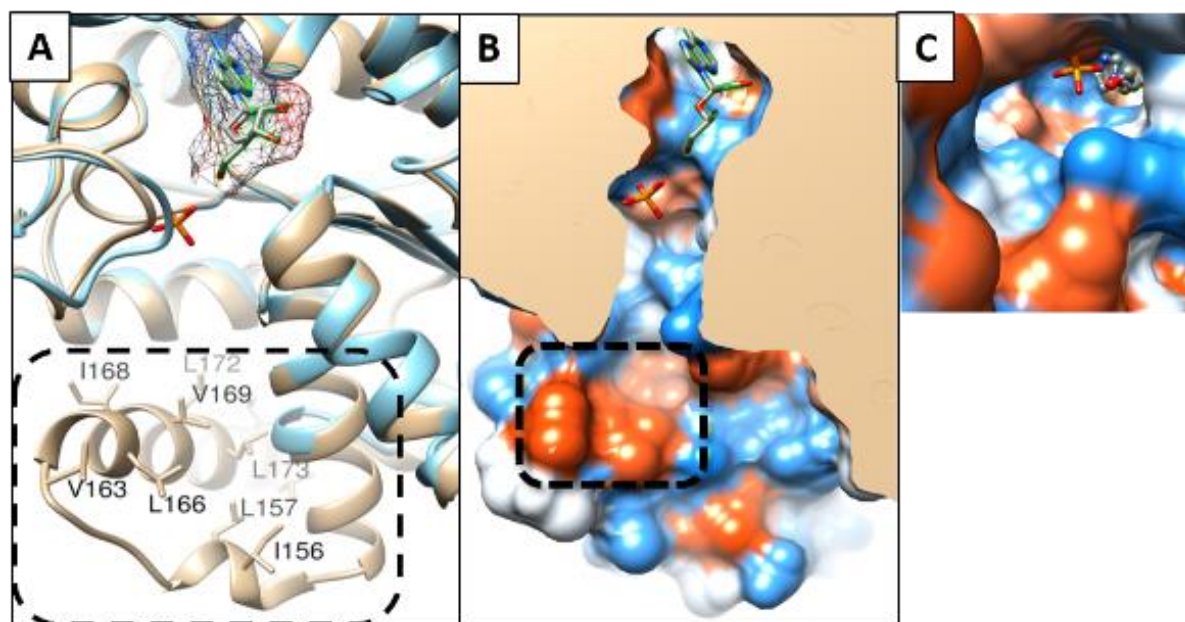

246  
247 **Figure 4. SAHH active site analysis.** (A) Adenosine-bound *Nf*SAHH (PDB: 5V96, tan) vs. *Hs*SAHH bound  
248 to adenosine analogue (PDB: 1A7A, blue); box highlights *Nf*-specific insertion with labelled hydrophobic residues.  
249 (B) Slice through *Nf*SAHH, with surface colored on Kite-Doolittle (blue-red) hydrophobicity scale; dashed box

250 indicates hydrophobic groove formed by Val163, Leu166, Val169 and Leu173 at opening of deep-seated adenosine  
251 pocket. (C) Same view as (B) tilted 90° shows opening from hydrophobic groove to adenosine pocket.

252

253 ***N. fowleri* phosphoglycerate mutase (NfPGM)**, a glycolysis enzyme, catalyzes the

254 isomerization of 3-phosphoglycerate and 2-phosphoglycerate during glycolysis and

255 gluconeogenesis and is regarded as a key enzyme in most organism's central metabolism (26).

256 There are two distinct forms of PGMs, differentiated by their need of 2, 3-bisphosphoglycerate

257 as a cofactor. PGM in mammals require the cofactor whereas PGM present in nematodes and

258 bacteria do not (27). The NfPGM is likely the cofactor-dependent PGM type. The crystal

259 structure of NfPGM (PDB: 5VVE) was solved at a resolution of 1.7 Å and consists of 250 amino

260 acid residues (~30 kDa).

261 The HsPGM and NfPGM structures share 61% identity. Residues surrounding the binding

262 pocket for citrate acid are all conserved, with the exception of a conservative change from a

263 Thr30 (*Nf*) to Ser30 (*Hs*). A comparison of the NfPGM structure to the homologous human

264 enzyme HsPGM (PDB: 5Y65) shows a conformational opening of the substrate binding site to

265 accommodate the KH2 ligand. However, the residues surrounding the inhibitor molecule and

266 supporting the movement of the peptide are identical between the two enzymes. It is likely that

267 with this high homologous identity that NfPGM is not a strong candidate for selective active site

268 inhibitor design.

269

270 ***N. fowleri* protein arginine N-methyltransferase (NfPRMT1)** methylates the nitrogen

271 atoms found on guanidinium side chains of arginine residues within proteins. The methylation of

272 nucleotide bases is a well-known mechanism of importance that influences DNA, nucleosomes,

273 and transcription functionalities (28). The enzyme is highly conserved across eukaryotes. Faulty

274 regulation or deviating expression of PRMTs is associated with various diseases including  
275 inflammatory, virus-related, pulmonary, and carcinogenesis (29). Overexpression of PRMTs has  
276 been observed in multiple forms and types of cancer, including PRMT1v1 overexpression in  
277 colon cancer (30) and large increases of PRMT1v2 in breast cancer (31). Inhibitor discovery and  
278 testing using PRMTs in cancer has been frequently employed (29). *Nf*PRMT1 was compared to  
279 the drug bound structure of *Hs*PRMT1 (PDB: 6NT2). The protein binds ligands at a dimer  
280 interface closing around two inhibitor molecules, one on each monomer. A large ligand binding  
281 loop is disordered in the *Nf*PRMT1 structure, presumably becoming ordered and visible in the  
282 crystal structure in the presence of inhibitor in the human structure. Due to the large binding  
283 surface for peptide substrates, PRMTs typically are promiscuous in nature with a wide range of  
284 binding substrates (29). Comparison of over 40 PRMT-inhibitor complexes revealed 5 distinct  
285 binding mechanisms at multiple sites including active site and allosteric binding pockets (32).  
286 Isozyme specific peptide mimics have been identified which preferentially bind *Hs*PRMT1 vs.  
287 *Hs*PRMT5 enzyme. A similar approach could be considered for selective *Nf*PRMT inhibitor  
288 development (33,34). There is still a need to improve both the affinity and selectivity of these  
289 micromolar, sub-micromolar potent PRMT inhibitors as well as to better understand the  
290 enzyme's biological and disease processes in greater scope (35).

291  
292 Despite high sequence identity in the ligand binding pocket, there are distinct differences in  
293 side chain orientation between the structures. These residues may change conformation upon  
294 binding inhibitor. A number of distinct features of *Nf*PRMT1 exist which can be exploited for  
295 potential structure-based approach to developing selective allosteric inhibitors against the *Nf*  
296 enzyme. A methionine is present in the *Nf*PRMT1 structure adjacent to the adenine moiety of the



297 S-adenosyl homocysteine (SAH) which differs significantly from all nine-known human  
298 PRMTs. The substrate binding region is lined by residues variant between *Nf* and all nine-known  
299 human PRMTs; for example, though the *Nf*PRMT1 pocket is similar to the allosteric inhibition  
300 pocket of *Hs*PRMT3, there are two tyrosine substitutions lining the pocket (36). Additionally, N-  
301 terminal residues which interact with inhibitors of *Hs*PRMT1 are largely not present or have  
302 limited interactions in *Nf*PRMT1 (37). Thus, inhibitors that selectively target *Nf*PRMT1 vs. the 9  
303 *Hs*PRMTs are envisioned due to structural differences near the ligand binding sites.

304  
305 ***N. fowleri* peptidylprolyl isomerase (*Nf*PPI)** is a member of a superfamily of proteins  
306 comprised of three structurally distinct main families: cyclophilins, FK506 binding proteins  
307 (FKBPs), and parvulins. Based on structural and sequence alignment, the *N. fowleri* structure  
308 falls in the FKBP family, a group of enzymes inhibited by compounds such as FK506 and  
309 rapamycin (38). PPIs assist protein folding and influence protein denaturation kinetics by  
310 catalyzing the cis/trans isomerization of peptide bonds preceding prolyl residues (39). The  
311 enzymes participate in a diverse array of processes ranging from signal transduction to gene  
312 regulation and have been found to have close interaction with heat shock 90 proteins (40). PPI  
313 inhibitors are an emerging class of drugs for many therapeutic areas including infectious diseases  
314 and many potent small molecule inhibitors have been derived for each of the members of the  
315 superfamily. However, selective inhibitor design has been difficult due to the shallow, broad,  
316 solvent-exposed active sites and their conservation between homologs and protein families (41).

317

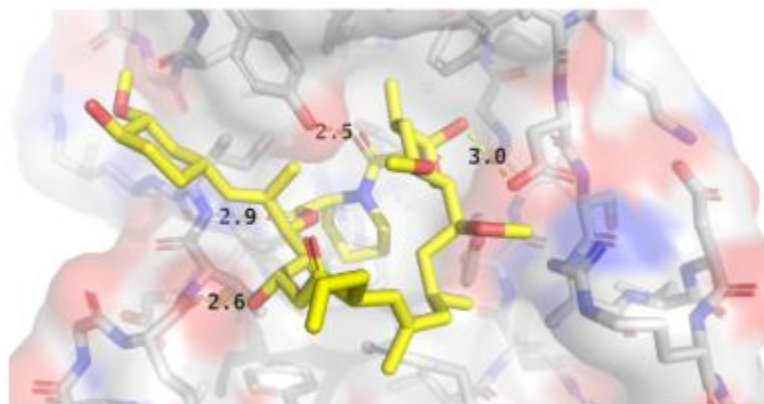

318 **Figure 5. Interactions between *NfPPI* and FK506.** FK506 (yellow-carbon stick model) sits inside a mostly  
319 hydrophobic binding pocket of *NfPPI* (white-carbon stick and surface model) consisting of Tyr38, Phe58, Trp71,  
320 and Phe111 on the distal side of the substrate. Hydrogen-bonding interactions exist between FK506 and the side  
321 chains of Asp49 and Tyr94, and the backbones of Glu66 and Ile68.

322

323 The interior of the binding pocket of *NfPPI* is mostly hydrophobic (**Figure 5**). Only four  
324 putative hydrogen-bonding interactions are observed between the enzyme and substrate. All  
325 residues involved in polar interactions in the *NfPPI* are also present in the human homolog  
326 *HsFKBP51* (PDB: 1KT0), but the regions occupied by two hydrophilic residues in  
327 *HsFKBP51*(Ser118 and Lys121) are instead occupied by hydrophobic residues, (Ile and Leu,  
328 respectively) (40). Another difference found in the conformation of this loop region is the  
329 insertion of an additional residue after Gly95 of *NfPPI*. These changes in structure and sequence  
330 may lead to selective inhibition and thus establish PPIs as a selective drug target for *Naegleria*.

331

332 ***N. fowleri* Prolyl-tRNA synthetase (*NfProRS*).** Aminoacyl-tRNA synthetases (ARSs) are  
333 globally essential enzymes among all living species. Their roles in protein translation and  
334 biosynthesis have been heavily researched and understood as attractive therapeutic targets.  
335 Recently, evidence of their propensity for adding new sequences or domains during ARS

336 evolution hints at broader functions and complexity outside of translation (42). Protein  
337 translation as a drug target has been validated for anti-infective compounds for a wide array of  
338 microbes (43). The natural product known as febrifugine, a quinazolinone alkaloid, and its  
339 analogues have shown antiparasitic activity in targeting ProRS. Halofuginone, a halogenated  
340 derivative of febrifugine, has shown promising potency though a lack of specificity, in that it  
341 inhibits both the parasite and human ProRS (43).

342

343 The structure of *Nf*ProRS folds into a  $\alpha 2$  homodimer (**Figure 6A**) with each subunit  
344 containing three domains characteristic of Class II ARSs: the catalytic domain, the anticodon  
345 binding domain, and the editing domain (**Figure 6B**). The *Nf*ProRS catalytic domain features the  
346 three motifs which are exclusively conserved between class II ARSs for both sequence and  
347 structure-function (**Figure 6C**). Motif 1 is located at the interface of the dimer and is  
348 hypothesized to facilitate communication between the active sites of the two subunits (44). Motif  
349 2 consists of  $\beta$ -strands connected by a variable loop which makes critical contacts with the  
350 acceptor stem of tRNA<sup>Pro</sup> and thus plays an important role in proper tRNA recognition (45).  
351 Motif 3 is made up of entirely hydrophobic residues and comprises an integral part of the  
352 aminoacylation active site.

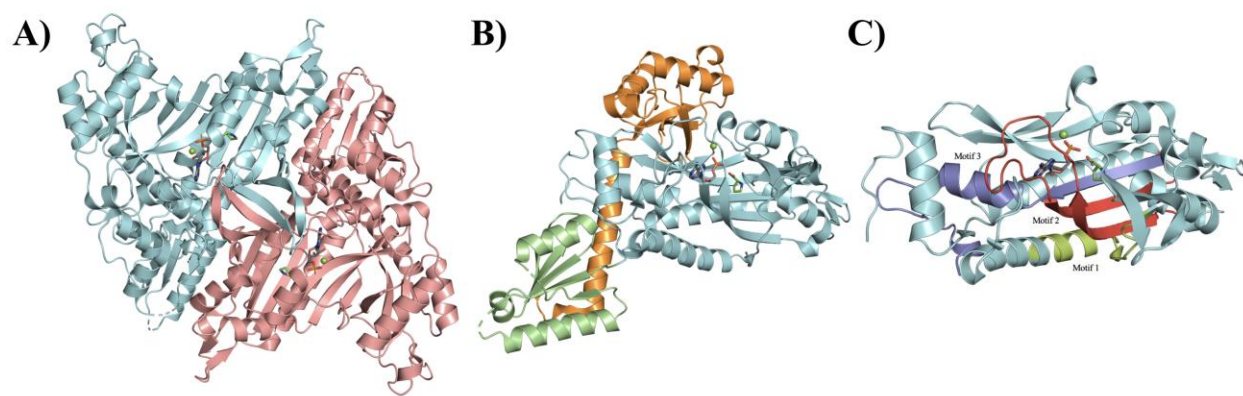

353

354 **Figure 6. Structure of the *Nf*ProRS.** (A) Both the biological and asymmetric unit of the structure are  
355 homodimeric. Individual polypeptide chains are shown in cyan and salmon. AMP, proline, and magnesium ligand  
356 molecules are also shown in yellow, purple, and green; respectively. (B) The three structure-function domains of  
357 *Nf*ProRS. The catalytic, anticodon binding, and editing domains are colored cyan, green, and orange; respectively.  
358 (C) The three highly conserved sequence motifs that characterize class II ARSs. Motif 1, colored lime, comprises  
359 the dimer interface. Motif 2, colored red, forms part of the acceptor stem. Motif 3, colored blue, is involved in  
360 forming the activated prolyl-adenylate.

361  
362 Alignment of *Nf*ProRS bound to AMP and proline ligands (PDB: 6NAB) with apo *Hs*ProRS  
363 (PDB: 4K87) exhibits no significant structural changes between the apo and ligand forms of the  
364 ARS. The eukaryotic and archaeal origins of these ProRS make them suitable comparisons for  
365 the reason mentioned earlier: their strict conservation in all three structural domains. Both the  
366 proline and AMP bound *Nf*ProRS (PDB: 6NAB) and the halofuginone and AMP-PNP bound  
367 *Nf*ProRS (PDB: 6UYH) structures have been solved. The proline and AMP *Nf*ProRS (6NAB)  
368 shares structural homology with the halofuginone liganded ProRS (6UYH) and halofuginone  
369 binding induces a conformational change of residues 80-87 of the *N. fowleri* enzyme. In the  
370 proline bound 6NAB structure, residues 80-88 form a two-turn alpha helix ( $\alpha 4$  in **Figure 7**).  
371 However, the halofuginone compound displaces Phe87 and disrupts the short helical structure.  
372 Residues making up this helix (EKDHVEGFS) are disordered in the 6UYH coordinate set. The  
373 equivalent region of the human ProRS (PDB: 4K87) is structurally homologous to the proline  
374 bound *N. fowleri* in the absence of halofuginone binding. The equivalent helix in 4K87, residues  
375 90-98 (EKTHVADFA), includes non-conservative amino acid substitution adjacent to the crucial  
376 phenylalanine which must be displaced for halofuginone to bind the human enzyme, including  
377 E85-G86 which are A-D in the human sequence. Exploiting differences in the mobility of this  
378 non-conserved loop adjacent to the active site of *Nf*ProRS and *Hs*ProRS could enable selective

379 targeting. In addition, allosteric inhibitors that take advantage of sequence differences  
 380 throughout the *Nf*ProRS might be found by screening, as was the case for *P. falciparum* ProRS  
 381 (*Pf*ProRS) (46). Thus, ProRS may be a reasonable drug target for *N. fowleri* drug development.  
 382

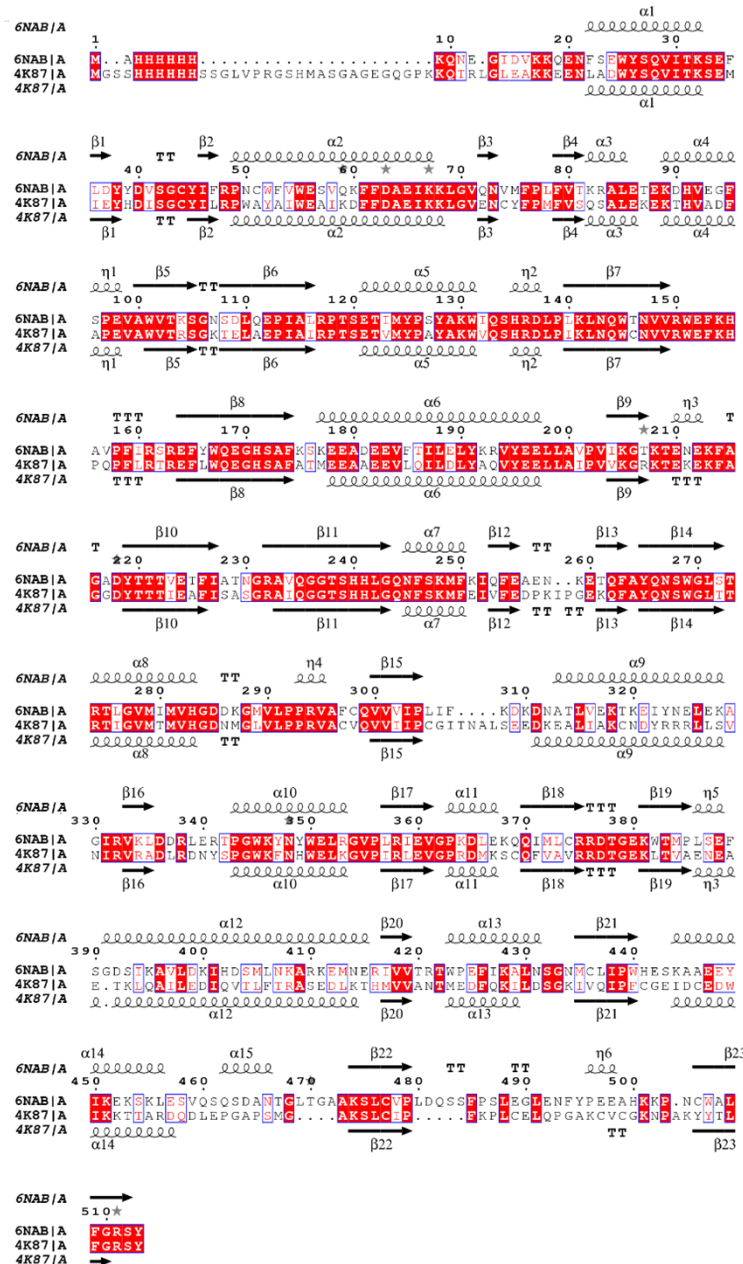

383  
 384 **Figure 7. Alignment of *Nf*ProRS against its human homolog.** Red background denotes residue conservation  
 385 between the two structures, black text with white background signifies differences and red text encompassed in a

386 blue box demonstrates differences in residues that are not categorized as significant and the residues belong to the  
387 same grouping. Secondary structure annotations signaling helices and sheet are reflective of both structures  
388 respectively. Other structures used in alignment: *H. sapiens* (PDB: 4K87\_A).

389

### 390 **3. CONCLUSION**

391 This manuscript reports 19 new protein structures from *N. fowleri* that are potential targets  
392 for structure-based drug discovery. Eighteen of 19 possess a >38% difference in AA alignment  
393 in comparison to the human homologs, suggesting selective inhibitors may be found by  
394 screening campaigns. In this paper we analyzed five of the *N. fowleri* enzymes that have ligands  
395 that define the active sites and compared them to human homologs. Though all are somewhat  
396 homologous at the active site, differences in four of the five *N. fowleri* enzymes analyzed support  
397 the hypothesis that selective active site inhibitors could be developed as therapeutics.

398

399 There are therapeutic opportunities, as well for some of the other 14 unexamined proteins as  
400 well. For example, the *Nf* serine tRNA synthetase (*Nf*SerRS) structure (PDB: 6BLJ). SerRS is  
401 required for charging tRNAs with serine critical for protein synthesis and thus is an essential  
402 gene. An insertion of four residues (391-395) adjacent to the substrate and tRNA binding sites  
403 creates a pocket with differential sequence identity to *Hs*SerRS and provides a foothold for the  
404 design of selective inhibitors blocking tRNA charging.

405

406 Even if selective active site inhibitors cannot be identified, high-throughput screening of  
407 compound libraries can still reveal selective inhibitors, as was found for *Plasmodium falciparum*  
408 ProRS compared with human *Hs*ProRS (46). In this case, two allosteric inhibitors were found to  
409 bury themselves into a lobe of the *Pf*ProRS enzyme, distant from the active site, and inhibit the

410 activity of the *Pf*ProRS enzyme, but not *Hs*ProRS. Selective high throughput screening of a  
411 eukaryotic enzyme including counter screening against the homologous human enzyme, can also  
412 identify selective inhibitors as has been shown by us in the case of *Plasmodium* N-  
413 myristoyltransferase (32). Focusing on essential genes and drug targets of other eukaryotes and  
414 producing a pool of potential drug target structures, SSGCID has created a foundation on which  
415 to build structure-based drug discovery. The relatively quick successful progress through the  
416 pipeline has catalyzed a consortium of investigators interested in addressing *N. fowleri* drug  
417 discovery.

418

## 419 **4. MATERIALS AND METHODS**

### 420 **4.1 Bioinformatics**

421 The complete genome and transcriptome is available on the EupathDB BRC website  
422 ([www.amoebadb.org](http://www.amoebadb.org)) (2). The complete ORFs and annotated predicted proteome from  
423 *Naegleria fowleri* strain ATCC30863 was downloaded from AmoebaDB release 24. Analysis of  
424 the ORFs indicated that 39% were missing a start codon and 12% were missing a stop codon.  
425 The sequence authors, the Wittwer group at the Spiez Laboratory, confirmed that the 40% of  
426 transcripts without an AUG start codon were most likely due to the ORF finder they used, which  
427 searches for the longest ORFs in the RNA assembly, but has no start codon finding function. To  
428 address this issue, we applied a conservative strategy to select high quality sequences from the  
429 draft genome. A sequence homology search using BlastP against DrugBank v.4.3 targets (4,212  
430 sequences) (15) and potential drug targets in the SSGCID pipeline (9,783 sequences) was  
431 performed. Sequences with at least 50% amino acid sequence identity over 70% coverage were  
432 selected for further filtering. Manual inspection indicated that half the potential targets without a

433 start codon appeared to be significantly truncated when compared to the *Naegleria gruberi* and  
434 other closely related Eukaryota orthologues. Therefore, additional filters were applied to remove  
435 likely truncated sequences: (1) targets without a start or stop codon were discarded, (2)  
436 remaining candidates were blasted against the *Naegleria gruberi* proteome and sequences with  
437 over 10% length difference to their *Naegleria gruberi* orthologues were discarded, and (3)  
438 shorter variants with 100% match to a longer ORF transcript were discarded. In the end, 178  
439 ORFs with a start and stop codon were identified, nominated, and approved by the SSGCID  
440 target selection board and NIAID to attempt structure determination.

441

## 442 **4.2 High-throughput Protein Expression and Purification**

443 All proteins discussed were PCR-amplified using cDNA as a template. RNA template of  
444 *Naegleria fowleri* ATCC30215 was provided by Dr. Christopher Rice (University of Georgia,  
445 Athens) through RNA extraction and cDNA synthesis using previously published methodology  
446 in *Acanthamoeba* (47). PCR, cloning, screening, sequencing, expression screening, large-scale  
447 expression and purification of proteins were performed as described in previous SSGCID  
448 publications (17,48). All described constructs were cloned into a ligation-independent cloning  
449 (LIC) pET-14b derived, N-terminal His tag expression vector, pBG1861. Targets were expressed  
450 using chemically competent *E.coli* BL21(DE3)R3 Rosetta cells and grown in large-scale  
451 quantities in an auto-induction media (49). All purifications were performed on an  
452 ÄKTAexplorer (GE) using automated IMAC and SEC programs in adherence to prior  
453 established procedures (17).

454

## 455 **4.3 Crystallization and Structure Determination**



456 Crystal trials, diffraction, and structure solution were performed as previously published  
457 (16). Protein was diluted to 20 mg/mL and single crystals were obtained through vapor diffusion  
458 in sitting drops directly. The screens and conditions that yielded the crystals are listed in  
459 **Supplementary Table 1**. The screens that were used to find the crystallization conditions were  
460 typically JCSG+ (Rigaku Reagents), MCSG1 (Microlytic/Anatrace), Morpheus (Molecular  
461 Dimensions), in some cases supplemented by ProPlex (Molecular Dimensions) and JCSG Top96  
462 (Rigaku Reagents). All data was integrated and scaled with *XDS* and *XSCALE* (50). Structures  
463 were solved by molecular replacement with *MOLREP* (51-53), as implemented in *MoRDa*. The  
464 structures were refined in iterative cycles of reciprocal space refinement in *Phenix* and real space  
465 refinement in *Coot* (54,55). The quality of all structures was continuously checked using  
466 *MolProbity* (56) as implemented in *Phenix*. Structural comparisons for analysis among  
467 homologues was done using DALI Protein Structure Comparison Server.

468

## 469 **5. ACKNOWLEDGMENTS**

470 This work was funded by National Institute of Allergy and Infectious Diseases contract  
471 numbers HHSN272201700059C and HHSN272201200025C. This research used resources of  
472 the Advanced Photon Source, a U.S. Department of Energy (DOE) Office of Science User  
473 Facility operated for the DOE Office of Science by Argonne National Laboratory under Contract  
474 No. DE-AC02-06CH11357. Use of the LS-CAT Sector 21 was supported by the Michigan  
475 Economic Development Corporation and the Michigan Technology Tri-Corridor (Grant  
476 085P1000817). We thank the SSGCID cloning and protein production groups at the Seattle  
477 Children's Research Institute and at the University of Washington and Allison Pires for  
478 assistance with the crystallography table. We would like to thank Erin Egan, Veda Gadiraju,

479 Caroline Francis, Becca Marks, and Matthew Howard who worked with Craig L. Smith on  
480 analyses of many of the *N. fowleri* reported structures, but their analyses were not reported in this  
481 paper.  
482

483 **6. REFERENCES**

- 484 1. Marciano-Cabral F, Cabral GA. The immune response to *Naegleria fowleri* amebae and  
485 pathogenesis of infection. *FEMS Immunol Med Microbiol*. 2007 Nov;51(2):243–59.
- 486 2. Grace E, Asbill S, Virga K. *Naegleria fowleri*: pathogenesis, diagnosis, and treatment  
487 options. *Antimicrob Agents Chemother*. 2015 Nov;59(11):6677–81.
- 488 3. Yoder JS, Eddy BA, Visvesvara GS, Capewell L, Beach MJ. The epidemiology of primary  
489 amoebic meningoencephalitis in the USA, 1962–2008. *Epidemiol Infect*. 2010  
490 Jul;138(07):968–75.
- 491 4. Visvesvara GS, Moura H, Schuster FL. Pathogenic and opportunistic free-living amoebae:  
492 *Acanthamoeba* spp., *Balamuthia mandrillaris*, *Naegleria fowleri* and *Sappinia diploidea*.  
493 *FEMS Immunol Med Microbiol*. 2007 Jun;50(1):1–26.
- 494 5. NIAID Emerging Infectious Diseases/ Pathogens | NIH: National Institute of Allergy and  
495 Infectious Diseases [Internet]. [cited 2020 Oct 12]. Available from:  
496 <http://www.niaid.nih.gov/research/emerging-infectious-diseases-pathogens>
- 497 6. Vugia DJ. Notes from the Field: Fatal *Naegleria fowleri* Meningoencephalitis After  
498 Swimming in Hot Spring Water — California, 2018. *MMWR Morb Mortal Wkly Rep*.  
499 2019;68.
- 500 7. Matanock A, Mehal JM, Liu L, Blau DM, Cope JR. Estimation of undiagnosed *Naegleria*  
501 *fowleri* primary amoebic meningoencephalitis, United States1. *Emerg Infect Dis*. 2018  
502 Jan;24(1):162–4.
- 503 8. El-Sayed A, Kamel M. Climatic changes and their role in emergence and re-emergence of  
504 diseases. *Environ Sci Pollut Res*. 2020 Jun;27(18):22336–52.
- 505 9. Siddiqui R, Khan NA. Primary amoebic meningoencephalitis caused by *Naegleria fowleri*:  
506 an old enemy presenting new challenges. *PLoS Negl Trop Dis*. 2014 Aug;8(8):e3017.
- 507 10. Chomba M, Mucheleng'anga LA, Fwoloshi S, Ngulube J, Mutengo MM. A case report:  
508 primary amoebic meningoencephalitis in a young Zambian adult. *BMC Infect Dis*. 2017  
509 Dec;17(1).
- 510 11. Debnath A, Nelson AT, Silva-Olivares A, Shibayama M, Siegel D, McKerrow JH. In Vitro  
511 Efficacy of Ebselen and BAY 11-7082 Against *Naegleria fowleri*. *Front Microbiol*.  
512 2018;9:414.
- 513 12. Colon BL, Rice CA, Guy RK, Kyle DE. Phenotypic screens reveal posaconazole as a  
514 rapidly acting amoebicidal combination partner for treatment of primary amoebic  
515 meningoencephalitis. *J Infect Dis*. 2019 Mar 15;219(7):1095–103.
- 516 13. Cope JR, Conrad DA, Cohen N, Cotilla M, DaSilva A, Jackson J, et al. Use of the novel  
517 therapeutic agent miltefosine for the treatment of primary amoebic meningoencephalitis:  
518 report of one fatal and one surviving case. *Clin Infect Dis Off Publ Infect Dis Soc Am*. 2016  
519 Mar 15;62(6):774–6.

- 520 14. Bellini NK, Santos TM, da Silva MTA, Thiemann OH. The therapeutic strategies against  
521 Naegleria fowleri. *Exp Parasitol.* 2018 Apr;187:1–11.
- 522 15. Law V, Knox C, Djoumbou Y, Jewison T, Guo AC, Liu Y, et al. DrugBank 4.0: shedding  
523 new light on drug metabolism. *Nucleic Acids Res.* 2014 Jan;42:D1091-1097.
- 524 16. Myler PJ, Stacy R, Stewart L, Staker BL, Van Voorhis WC, Varani G, et al. The Seattle  
525 Structural Genomics Center for Infectious Disease (SSGCID). *Infect Disord Drug Targets.*  
526 2009 Nov;9(5):493–506.
- 527 17. Bryan CM, Bhandari J, Napuli AJ, Leibly DJ, Choi R, Kelley A, et al. High-throughput  
528 protein production and purification at the Seattle Structural Genomics Center for Infectious  
529 Disease. *Acta Crystallograph Sect F Struct Biol Cryst Commun.* 2011 Sep 1;67(Pt  
530 9):1010–4.
- 531 18. Baugh L, Gallagher LA, Patrapuvich R, Clifton MC, Gardberg AS, Edwards TE, et al.  
532 Combining functional and structural genomics to sample the essential Burkholderia  
533 structome. *PloS One.* 2013;8(1):e53851.
- 534 19. Stacy R, Begley DW, Phan I, Staker BL, Van Voorhis WC, Varani G, et al. Structural  
535 genomics of infectious disease drug targets: the SSGCID. *Acta Crystallograph Sect F*  
536 *Struct Biol Cryst Commun.* 2011 Sep 1;67(Pt 9):979–84.
- 537 20. Milanes JE, Suryadi J, Abendroth J, Van Voorhis WC, Barrett KF, Dranow DM, et al.  
538 Enzymatic and structural characterization of the Naegleria fowleri glucokinase. *Antimicrob*  
539 *Agents Chemother.* 2019 Apr 25;63(5).
- 540 21. Tehlivets O, Malanovic N, Visram M, Pavkov-Keller T, Keller W. S-adenosyl-L-  
541 homocysteine hydrolase and methylation disorders: yeast as a model system. *Biochim*  
542 *Biophys Acta.* 2013 Jan;1832(1):204–15.
- 543 22. Cai S, Li Q-S, Borchardt RT, Kuczera K, Schowen RL. The antiviral drug ribavirin is a  
544 selective inhibitor of S-adenosyl-L-homocysteine hydrolase from *Trypanosoma cruzi*.  
545 *Bioorg Med Chem.* 2007 Dec 1;15(23):7281–7.
- 546 23. Czyrko J, Sliwiak J, Imiolczyk B, Gdaniec Z, Jaskolski M, Brzezinski K. Metal-cation  
547 regulation of enzyme dynamics is a key factor influencing the activity of S-adenosyl-L-  
548 homocysteine hydrolase from *Pseudomonas aeruginosa*. *Sci Rep.* 2018 Jul 27;8(1):11334.
- 549 24. Kusakabe Y, Ishihara M, Umeda T, Kuroda D, Nakanishi M, Kitade Y, et al. Structural  
550 insights into the reaction mechanism of S-adenosyl-L-homocysteine hydrolase. *Sci Rep.*  
551 2015 Dec;5(1).
- 552 25. Reddy MCM, Kuppan G, Shetty ND, Owen JL, Ioerger TR, Sacchettini JC. Crystal  
553 structures of *Mycobacterium tuberculosis* S-adenosyl-L-homocysteine hydrolase in ternary  
554 complex with substrate and inhibitors. *Protein Sci Publ Protein Soc.* 2008  
555 Dec;17(12):2134–44.
- 556 26. Oost J, Huynen MA, Verhees CH. Molecular characterization of phosphoglycerate mutase  
557 in archaea. *FEMS Microbiol Lett.* 2002 Jun;212(1):111–20.

- 558 27. Sainas S, Dosio F, Boschi D, Lolli ML. Targeting human onchocerciasis: recent advances  
559 beyond ivermectin. *Annual Reports in Medicinal Chemistry*. Elsevier. 2018.1–38.
- 560 28. Krause CD, Yang Z-H, Kim Y-S, Lee J-H, Cook JR, Pestka S. Protein arginine  
561 methyltransferases: Evolution and assessment of their pharmacological and therapeutic  
562 potential. *Pharmacol Ther*. 2007 Jan;113(1):50–87.
- 563 29. Hu H, Qian K, Ho M-C, Zheng YG. Small molecule inhibitors of protein arginine  
564 methyltransferases. *Expert Opin Investig Drugs*. 2016;25(3):335–58.
- 565 30. Mathioudaki K, Papadokostopoulou A, Scorilas A, Xynopoulos D, Agnanti N, Talieri M. The  
566 PRMT1 gene expression pattern in colon cancer. *Br J Cancer*. 2008 Dec 9;99(12):2094–9.
- 567 31. Baldwin RM, Morettin A, Paris G, Goulet I, Côté J. Alternatively spliced protein arginine  
568 methyltransferase 1 isoform PRMT1v2 promotes the survival and invasiveness of breast  
569 cancer cells. *Cell Cycle*. 2012 Dec 15;11(24):4597–612.
- 570 32. Tewary SK, Zheng YG, Ho M-C. Protein arginine methyltransferases: insights into the  
571 enzyme structure and mechanism at the atomic level. *Cell Mol Life Sci CMLS*. 2019  
572 Aug;76(15):2917–32.
- 573 33. Mann SA, DeMart MK, May B, Causey CP, Knuckley B. Histone H4-based peptoids are  
574 inhibitors of protein arginine methyltransferase 1 (PRMT1). *Biochem J*. 2020 Aug  
575 28;477(16):2971–80.
- 576 34. Mann SA, Salsburg A, Causey CP, Knuckley B. The development and characterization of a  
577 chemical probe targeting PRMT1 over PRMT5. *Bioorg Med Chem*. 2019 01;27(1):224–9.
- 578 35. Fulton MD, Brown T, Zheng YG. Mechanisms and Inhibitors of Histone Arginine  
579 Methylation. *Chem Rec*. 2018 Dec;18(12):1792–807.
- 580 36. Kaniskan HÜ, Eram MS, Zhao K, Szewczyk MM, Yang X, Schmidt K, et al. Discovery of  
581 potent and selective allosteric inhibitors of protein arginine methyltransferase 3 (PRMT3). *J*  
582 *Med Chem*. 2018 Feb 8;61(3):1204–17.
- 583 37. Fedoriw A, Rajapurkar SR, O'Brien S, Gerhart SV, Mitchell LH, Adams ND, et al. Anti-  
584 tumor Activity of the Type I PRMT Inhibitor, GSK3368715, Synergizes with PRMT5  
585 Inhibition through MTAP Loss. *Cancer Cell*. 2019 08;36(1):100-114.e25.
- 586 38. Stocki P, Sawicki M, Mays CE, Hong SJ, Chapman DC, Westaway D, et al. Inhibition of  
587 the FKBP family of peptidyl prolyl isomerases induces abortive translocation and  
588 degradation of the cellular prion protein. *Mol Biol Cell*. 2016 Mar 1;27(5):757–67.
- 589 39. Ünal CM, Steinert M. Microbial peptidyl-prolyl cis/trans isomerases (PPIases): virulence  
590 factors and potential alternative drug targets. *Microbiol Mol Biol Rev MMBR*. 2014  
591 Sep;78(3):544–71.
- 592 40. Sinars CR, Cheung-Flynn J, Rimerman RA, Scammell JG, Smith DF, Clardy J. Structure of  
593 the large FK506-binding protein FKBP51, an Hsp90-binding protein and a component of  
594 steroid receptor complexes. *Proc Natl Acad Sci*. 2003 Feb 4;100(3):868–73.

- 595 41. Dnyak BM, Gestwicki JE. Peptidyl-Proline Isomerases (PPlases): Targets for natural  
596 products and natural product-inspired compounds. *J Med Chem.* 2016 10;59(21):9622–44.
- 597 42. Lee E-Y, Kim S, Kim MH. Aminoacyl-tRNA synthetases, therapeutic targets for infectious  
598 diseases. *Biochem Pharmacol.* 2018 Aug;154:424–34.
- 599 43. Pham JS, Dawson KL, Jackson KE, Lim EE, Pasaje CFA, Turner KEC, et al. Aminoacyl-  
600 tRNA synthetases as drug targets in eukaryotic parasites. *Int J Parasitol Drugs Drug*  
601 *Resist.* 2014 Apr;4(1):1–13.
- 602 44. Pang YLJ, Poruri K, Martinis SA. tRNA synthetase: tRNA aminoacylation and beyond.  
603 *Wiley Interdiscip Rev RNA.* 2014 Aug;5(4):461–80.
- 604 45. Burke B, Yang F, Chen F, Stehlin C, Chan B, Musier-Forsyth K. Evolutionary coadaptation  
605 of the motif 2--acceptor stem interaction in the class II prolyl-tRNA synthetase system.  
606 *Biochemistry.* 2000 Dec 19;39(50):15540–7.
- 607 46. Hewitt SN, Dranow DM, Horst BG, Abendroth JA, Forte B, Hallyburton I, et al. Biochemical  
608 and structural characterization of selective allosteric inhibitors of the *Plasmodium*  
609 *falciparum* drug target, prolyl-tRNA-synthetase. *ACS Infect Dis.* 2017 Jan 13;3(1):34–44.
- 610 47. Rice CA, Campbell SJ, Bisson C, Owen HJ, Sedelnikova SE, Baker PJ, et al. Structural  
611 and functional studies of histidine biosynthesis in *Acanthamoeba* spp. demonstrates a  
612 novel molecular arrangement and target for antimicrobials. *PloS One.*  
613 2018;13(7):e0198827.
- 614 48. Choi R, Kelley A, Leibly D, Nakazawa Hewitt S, Napuli A, Van Voorhis W. Immobilized  
615 metal-affinity chromatography protein-recovery screening is predictive of crystallographic  
616 structure success. *Acta Crystallogr Sect F Struct Biol Cryst Commun.* 2011 Sep  
617 1;67(9):998–1005.
- 618 49. Studier FW. Protein production by auto-induction in high-density shaking cultures. *Protein*  
619 *Expr Purif.* 2005 May;41(1):207–34.
- 620 50. Kabsch W. XDS. *Acta Crystallogr D Biol Crystallogr.* 2010 Feb;66(Pt 2):125–32.
- 621 51. Vagin A, Teplyakov A. Molecular replacement with MOLREP. *Acta Crystallogr D Biol*  
622 *Crystallogr.* 2010 Jan;66(Pt 1):22–5.
- 623 52. Lebedev AA, Vagin AA, Murshudov GN. Model preparation in *MOLREP* and examples of  
624 model improvement using X-ray data. *Acta Crystallogr D Biol Crystallogr.* 2008 Jan  
625 1;64(1):33–9.
- 626 53. Murshudov GN, Skubák P, Lebedev AA, Pannu NS, Steiner RA, Nicholls RA, et al.  
627 *REFMAC 5* for the refinement of macromolecular crystal structures. *Acta Crystallogr D Biol*  
628 *Crystallogr.* 2011 Apr 1;67(4):355–67.
- 629 54. Emsley P, Cowtan K. Coot: model-building tools for molecular graphics. *Acta Crystallogr D*  
630 *Biol Crystallogr.* 2004 Dec;60(Pt 12 Pt 1):2126–32.

- 631 55. Emsley P, Lohkamp B, Scott WG, Cowtan K. Features and development of Coot. *Acta*  
632 *Crystallogr D Biol Crystallogr*. 2010 Apr;66(Pt 4):486–501.
- 633 56. Chen VB, Arendall WB, Headd JJ, Keedy DA, Immormino RM, Kapral GJ, et al.  
634 MolProbity: all-atom structure validation for macromolecular crystallography. *Acta*  
635 *Crystallogr D Biol Crystallogr*. 2010 Jan;66(Pt 1):12–21.
- 636
